# Supplementary material for: Onset and persistence of depression in older people—results from a 2-year community follow-up study
Source: Oxford University Press journal article supplement (doi:10.1093/ageing/afi216), 2005-11-22
Supplement: afi216_Supplementary_Data.zip [file afi216_Supplementary_Data.zip]

Archive with 1 entries (1 files):
- afi216supp.pdf
