# Supplementary material for: Onset and persistence of depression in older people—results from a 2-year community follow-up study
Source: Oxford University Press journal article supplement (doi:10.1093/ageing/afi216), 2005-11-22
Supplement: afi216_Supplementary_Data.zip [file afi216_Supplementary_Data.zip › afi216supp.pdf]

**Supplementary data:**

**Appendix 1**

**Study flow chart**

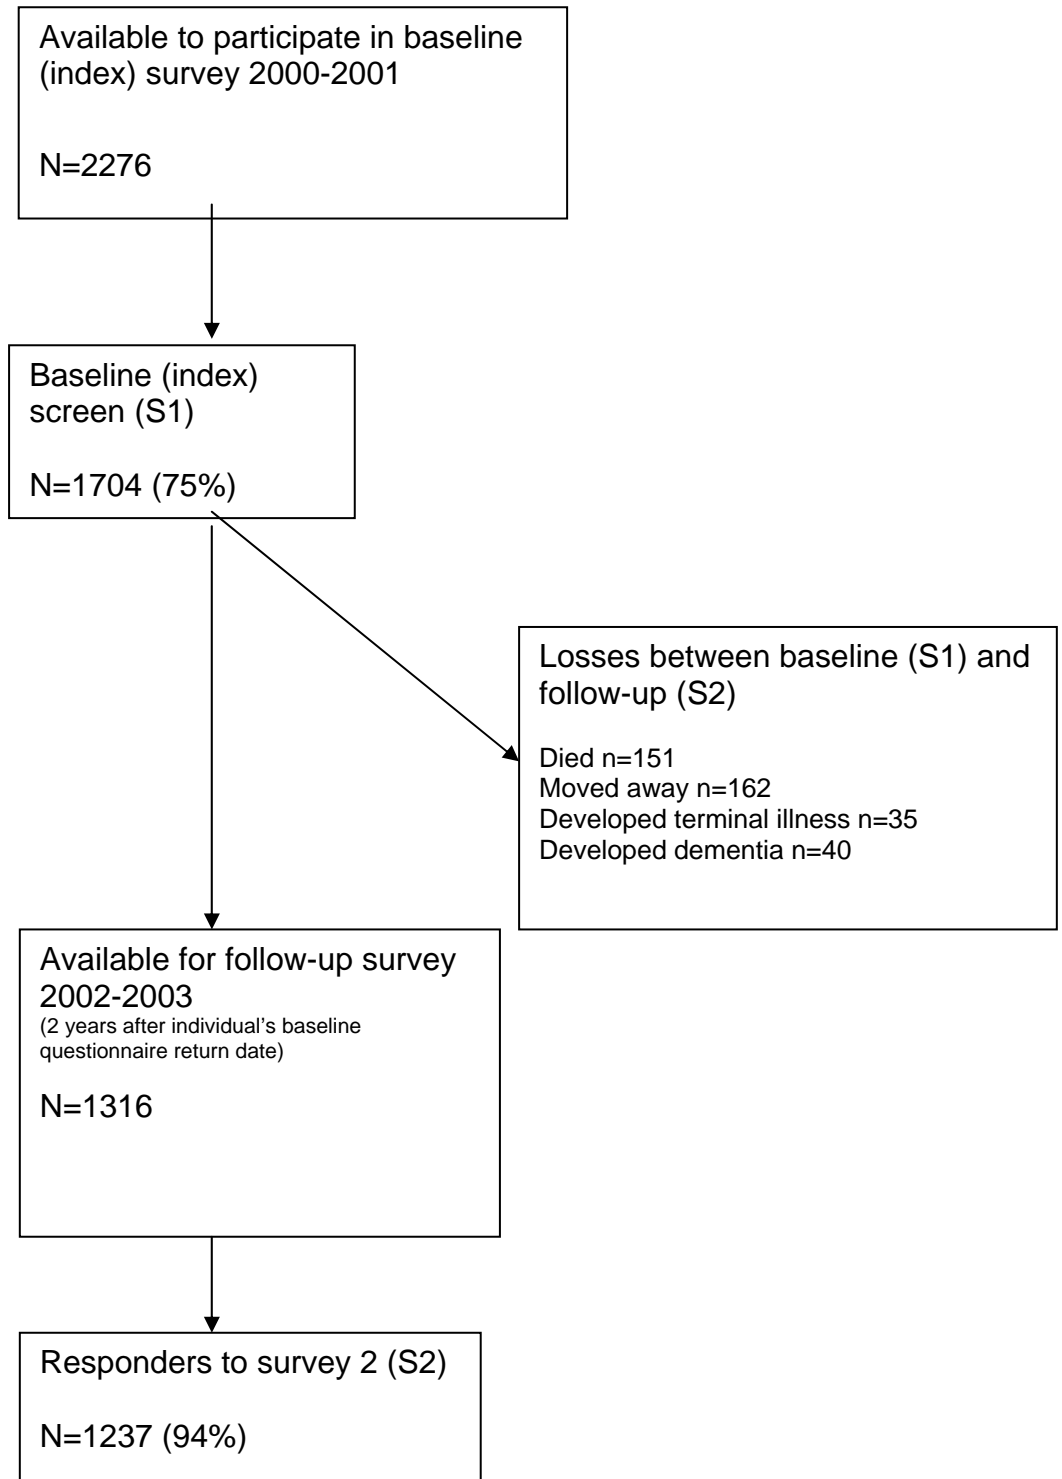

## Appendix 2: Questionnaire measures for baseline and follow-up studies<sup>a</sup>

| Questionnaire measures                                                                 | Detail                                                                                                                                                                                                                                                                       | Reference                                                                                   |
|----------------------------------------------------------------------------------------|------------------------------------------------------------------------------------------------------------------------------------------------------------------------------------------------------------------------------------------------------------------------------|---------------------------------------------------------------------------------------------|
| <u>Depression symptoms</u><br>Geriatric Depression Scale (GDS-15)                      | 15 yes / no items. Cut-off >5/15 has sensitivity of 78% & specificity of 82% for detecting major depression                                                                                                                                                                  | D'Ath et al 1994 [1]                                                                        |
| <u>Other psychological factors</u><br><i>FEAR (anxiety scale)</i>                      | 4 item version of Anxiety Disorder Scale (frequency of anxiety, enduring nature of anxiety; alcohol /sedative use; restlessness / fidgeting) validated for use as a rapid primary care screening instrument.                                                                 | Krasucki et al 1999 [2]                                                                     |
| Health locus of control                                                                | 3 scales, (2 items per scale):<br>i) internality, (belief that you control your own health);<br>ii) chance (belief that your health is controlled by fate);<br>iii) powerful others, (belief that your health is controlled by others, including doctors & modern medicine). | Perrig-Chiello, Perrig, & Stahelin. 1999 [3]                                                |
| <u>Physical health</u><br>General Health                                               | Single question.                                                                                                                                                                                                                                                             | Health Survey for England (HSE) 1998 [4]                                                    |
| Long-standing illness (LSI)                                                            | Single question.                                                                                                                                                                                                                                                             | HSE 1998 [4]                                                                                |
| Limiting LSI                                                                           | Single question.                                                                                                                                                                                                                                                             | HSE 1998 [4]                                                                                |
| Pain                                                                                   | Single question pain in last 4 weeks                                                                                                                                                                                                                                         | Ware & Sherbourne 1992 [5]                                                                  |
| Chronic health problems                                                                | Adapted from checklist of chronic health conditions used in Alameda County Study.                                                                                                                                                                                            | Roberts et al 1997 [6]                                                                      |
| Functional ability / disability                                                        | Modified Townsend disability score. Degree of difficulty in performing 9 activities of daily living, score 0-18.                                                                                                                                                             | (adapted)<br>McGee et al 1998 [7]                                                           |
| Visual impairment                                                                      | Single question                                                                                                                                                                                                                                                              | HSE 1995 [8]                                                                                |
| Hearing impairment                                                                     | Single question                                                                                                                                                                                                                                                              | HSE 1995 [8]                                                                                |
| <i>Smoking</i>                                                                         | Current & previous smoking status                                                                                                                                                                                                                                            | HSE 1998 [4] (adapted)                                                                      |
| <i>Alcohol</i>                                                                         | Current frequency of alcohol intake and units per week                                                                                                                                                                                                                       | HSE 1998 [4] (adapted)                                                                      |
| <u>Social networks &amp; support</u><br>Availability of support & frequency of contact | Marital status<br>Contact with friends, relatives, neighbours<br>Telephone contact with friends, relatives<br>Attendance at religious services                                                                                                                               | General Household Survey (GHS) 1994 [9]<br>Donald et al 1987 [10]<br>Donald et al 1987 [10] |
| Existence of a confidante                                                              | Someone to discuss a personal /serious problem with                                                                                                                                                                                                                          | Kouzis & Eaton 1998 [11]                                                                    |
| Satisfaction with support                                                              | Satisfied with help & support provided by close friends                                                                                                                                                                                                                      | Prince et al 1997 [12]                                                                      |
| Experience conflict or upset                                                           | Experience conflict or upset with friends or relatives                                                                                                                                                                                                                       | Prince 1997 [12] (adapted)                                                                  |
| Living alone                                                                           | Single item                                                                                                                                                                                                                                                                  |                                                                                             |
| Time spent alone                                                                       | Single item                                                                                                                                                                                                                                                                  | Tunstall 1966 [13] (adapted)                                                                |
| Loneliness                                                                             | Single item                                                                                                                                                                                                                                                                  | Tunstall 1966 [13] (adapted)                                                                |
| <u>Life events</u><br><i>Life events occurring in the 2 years between surveys</i>      | 8 item scale covering: serious illness / injury (self or close relative); bereavement, separation; financial crisis; theft; move into residential care (self or partner)                                                                                                     | Brugha & Cragg 1990 [14] (adapted)                                                          |
| <u>Socio-economic factors</u><br><i>Social class</i>                                   | UK Registrar General's Classification, based on last main occupation                                                                                                                                                                                                         | Office of Population Censuses & Surveys 1990 [15]<br>GHS 1994 [9]                           |
| <i>Age finished full-time education</i>                                                | Single item                                                                                                                                                                                                                                                                  |                                                                                             |
| <i>Housing tenure</i>                                                                  | Single item                                                                                                                                                                                                                                                                  | HSE 1998 <sup>4</sup> & GHS 1994 [9]                                                        |
| <i>Occupational Pension</i>                                                            | Single item                                                                                                                                                                                                                                                                  | GHS 1994 [9]                                                                                |
| <i>Cutting back on spending to pay bills</i>                                           | Developed ourselves, relates to measure of financial strain used in Alameda County Study                                                                                                                                                                                     | Roberts et al 1997 [6]                                                                      |
| <i>Private health insurance</i>                                                        | Single item developed ourselves                                                                                                                                                                                                                                              | (adapted)                                                                                   |

<sup>a</sup>Measures in italics were assessed only at baseline survey (except life events, assessed only at follow-up survey). All other measures were assessed at baseline and follow-up surveys.

# Supplementary data reference list

- S 1. D'Ath P, Katona P, Mullan E, Evans S, Katona C. Screening, detection and management of depression in elderly primary care attenders. I: The acceptability and performance of the 15 item Geriatric Depression Scale (GDS15) and the development of short versions. *Fam.Pract.* 1994;**11**:260-6.
- S 2. Krasucki C, Ryan P, Ertan T, Howard R, Lindesay J, Mann A. The FEAR: a rapid screening instrument for generalized anxiety in elderly primary care attenders. *Int.J.Geriatr.Psychiatry* 1999;**14**:60-8.
- S 3. Perrig-Chiello P, Perrig W, Stahelin H B. Health control beliefs in old age - relationship with subjective and objective health and health behaviour. *Psych Health Med* 1999;**4**:83-94.
- S 4. Joint Health Surveys Unit. Health Survey for England 1998. Volume 2:Methodology and Documentation. 1999. London, The Stationery Office.
- S 5. Ware JE, Sherbourne CD. The MOS 36-item short form health survey: conceptual framework and item selection. *Med Care* 1992;**30**:473-83.
- S 6. Roberts RE, Kaplan GA, Shema SJ, Strawbridge WJ. Prevalence and correlates of depression in an aging cohort: the Alameda County Study. *J.Gerontol.B Psychol.Sci.Soc.Sci.* 1997;**52**:S252-S258.
- S 7. McGee MA, Johnson A, Kay D. The Medical Research Council Cognitive Functioning and Ageing Study (MRC CFAS). The description of activities of daily living in five centres in England and Wales. *Age & Ageing.* 1998;**27**:605-13.
- S 8. Joint Health Surveys Unit. Health Survey for England 1995. Volume 2: Survey Methodology and Documentation. 1997. London, The Stationery Office.
- S 9. Office of Population Censuses and Surveys. Living in Britain. Results from the 1994 General Household Survey. 1996. London, HMSO.
- S10. Donald, C. A, Ware, J. E, Brook, R. H, and Davies-Avery, A. Rand Social Activities Questionnaire. Conceptualisation and Measurement of Health for Adults in the Health Insurance Study. R-1987/4/HEW. 1987. Santa Monica, Rand Corporation.
- S11. Kouzis AC, Eaton WW. Absence of social networks, social support and health services utilization. *Psychol.Med.* 1998;**28**:1301-10.
- S12. Prince MJ, Harwood RH, Blizard RA, Thomas A, Mann AH. Social support deficits, loneliness and life events as risk factors for depression in old age. The Gospel Oak Project VI. *Psychol.Med.* 1997;**27**:323-32.
- S13. Tunstall J. Old and Alone. London: Routledge and Kegan, 1966.
- S14. Brugha TS, Cragg D. The List of Threatening Experiences: the reliability and validity of a brief life events questionnaire. *Acta Psychiatr.Scand.* 1990;**82**:77-81.
- S15. Office of Population Censuses and Surveys. Standard Occupational Classification. 1990. London, HMSO.
